# Supplementary material
Source: HighWire-hosted journal article supplement (https://cmaj.ca/highwire/filestream/58321/field_highwire_adjunct_files/1/nursing-hu-2-at.pdf)
Supplement: nursing-hu-2-at.pdf [file nursing-hu-2-at.pdf]

## Appendix 2 (as submitted by the authors)

**Table 1** Diagnostic and procedure codes used to identify study outcomes

| Outcome                                      | Positive Predictive Value <sup>1</sup> | Diagnostic codes                                                                 |                                   | Procedure codes                                |
|----------------------------------------------|----------------------------------------|----------------------------------------------------------------------------------|-----------------------------------|------------------------------------------------|
|                                              |                                        | ICD-9                                                                            | ICD-10                            | CCP <sup>(1)</sup>                             |
| Myocardial infarction                        | 94% <sup>1</sup>                       | 410.xx<br>Excluding 410.x2 (codes related to subsequent episodes of care)        | I21                               |                                                |
| Heart failure                                | 94% <sup>2</sup>                       | 428                                                                              | I50                               |                                                |
| Cardiac arrest                               | 82% <sup>3</sup>                       | 427.5                                                                            | I46                               |                                                |
| Ventricular arrhythmia                       | 82% <sup>3</sup>                       | 427.1, 427.4, 427.69                                                             | I472, I490                        |                                                |
| Ischemic stroke or transient ischemic attack | 96% <sup>4</sup>                       | 433.xx-436.xx<br>Excluding 433.x0, 434.x0 (no mention of cerebral infarction)    | I63, I64, G45                     |                                                |
| Femur fracture <sup>(2)</sup>                | 98% <sup>5</sup>                       | 820-821, minimum length of stay of 1 day required to rule out diagnostic work-up | S72                               | 9054, 9104, 9114, 9124, 9134, 9144, 9154, 9164 |
| Pneumonia                                    | 96% <sup>6</sup>                       | 480-486                                                                          | J12, J13, J14, J15, J16, J17, J18 |                                                |
| Venous thromboembolism                       | n/a                                    | 415.1, 451.1, 451.81, 453.8                                                      | I26, I801, I802, I803, I808, I828 |                                                |

<sup>(1)</sup> Canadian Classification of Diagnostic, Therapeutic and Surgical Procedures

<sup>(2)</sup> Although the concern for some psychotropic medications is truly the risk of falls, this outcome cannot be reliably assessed on the basis of claims data since E-codes tend to be underused. Hospitalizations with a diagnosis of femur fracture or with a procedural code indicative of surgical repair of a femur fracture were used instead.

n/a: not available

<sup>1</sup> The positive predictive value is a function of the prevalence of the outcome and might thus be different in our study population.
